# Supplementary material
Source: MDPI journal article supplement (https://www.mdpi.com/1999-4907/8/9/319)
Supplement: s1 [file s1]

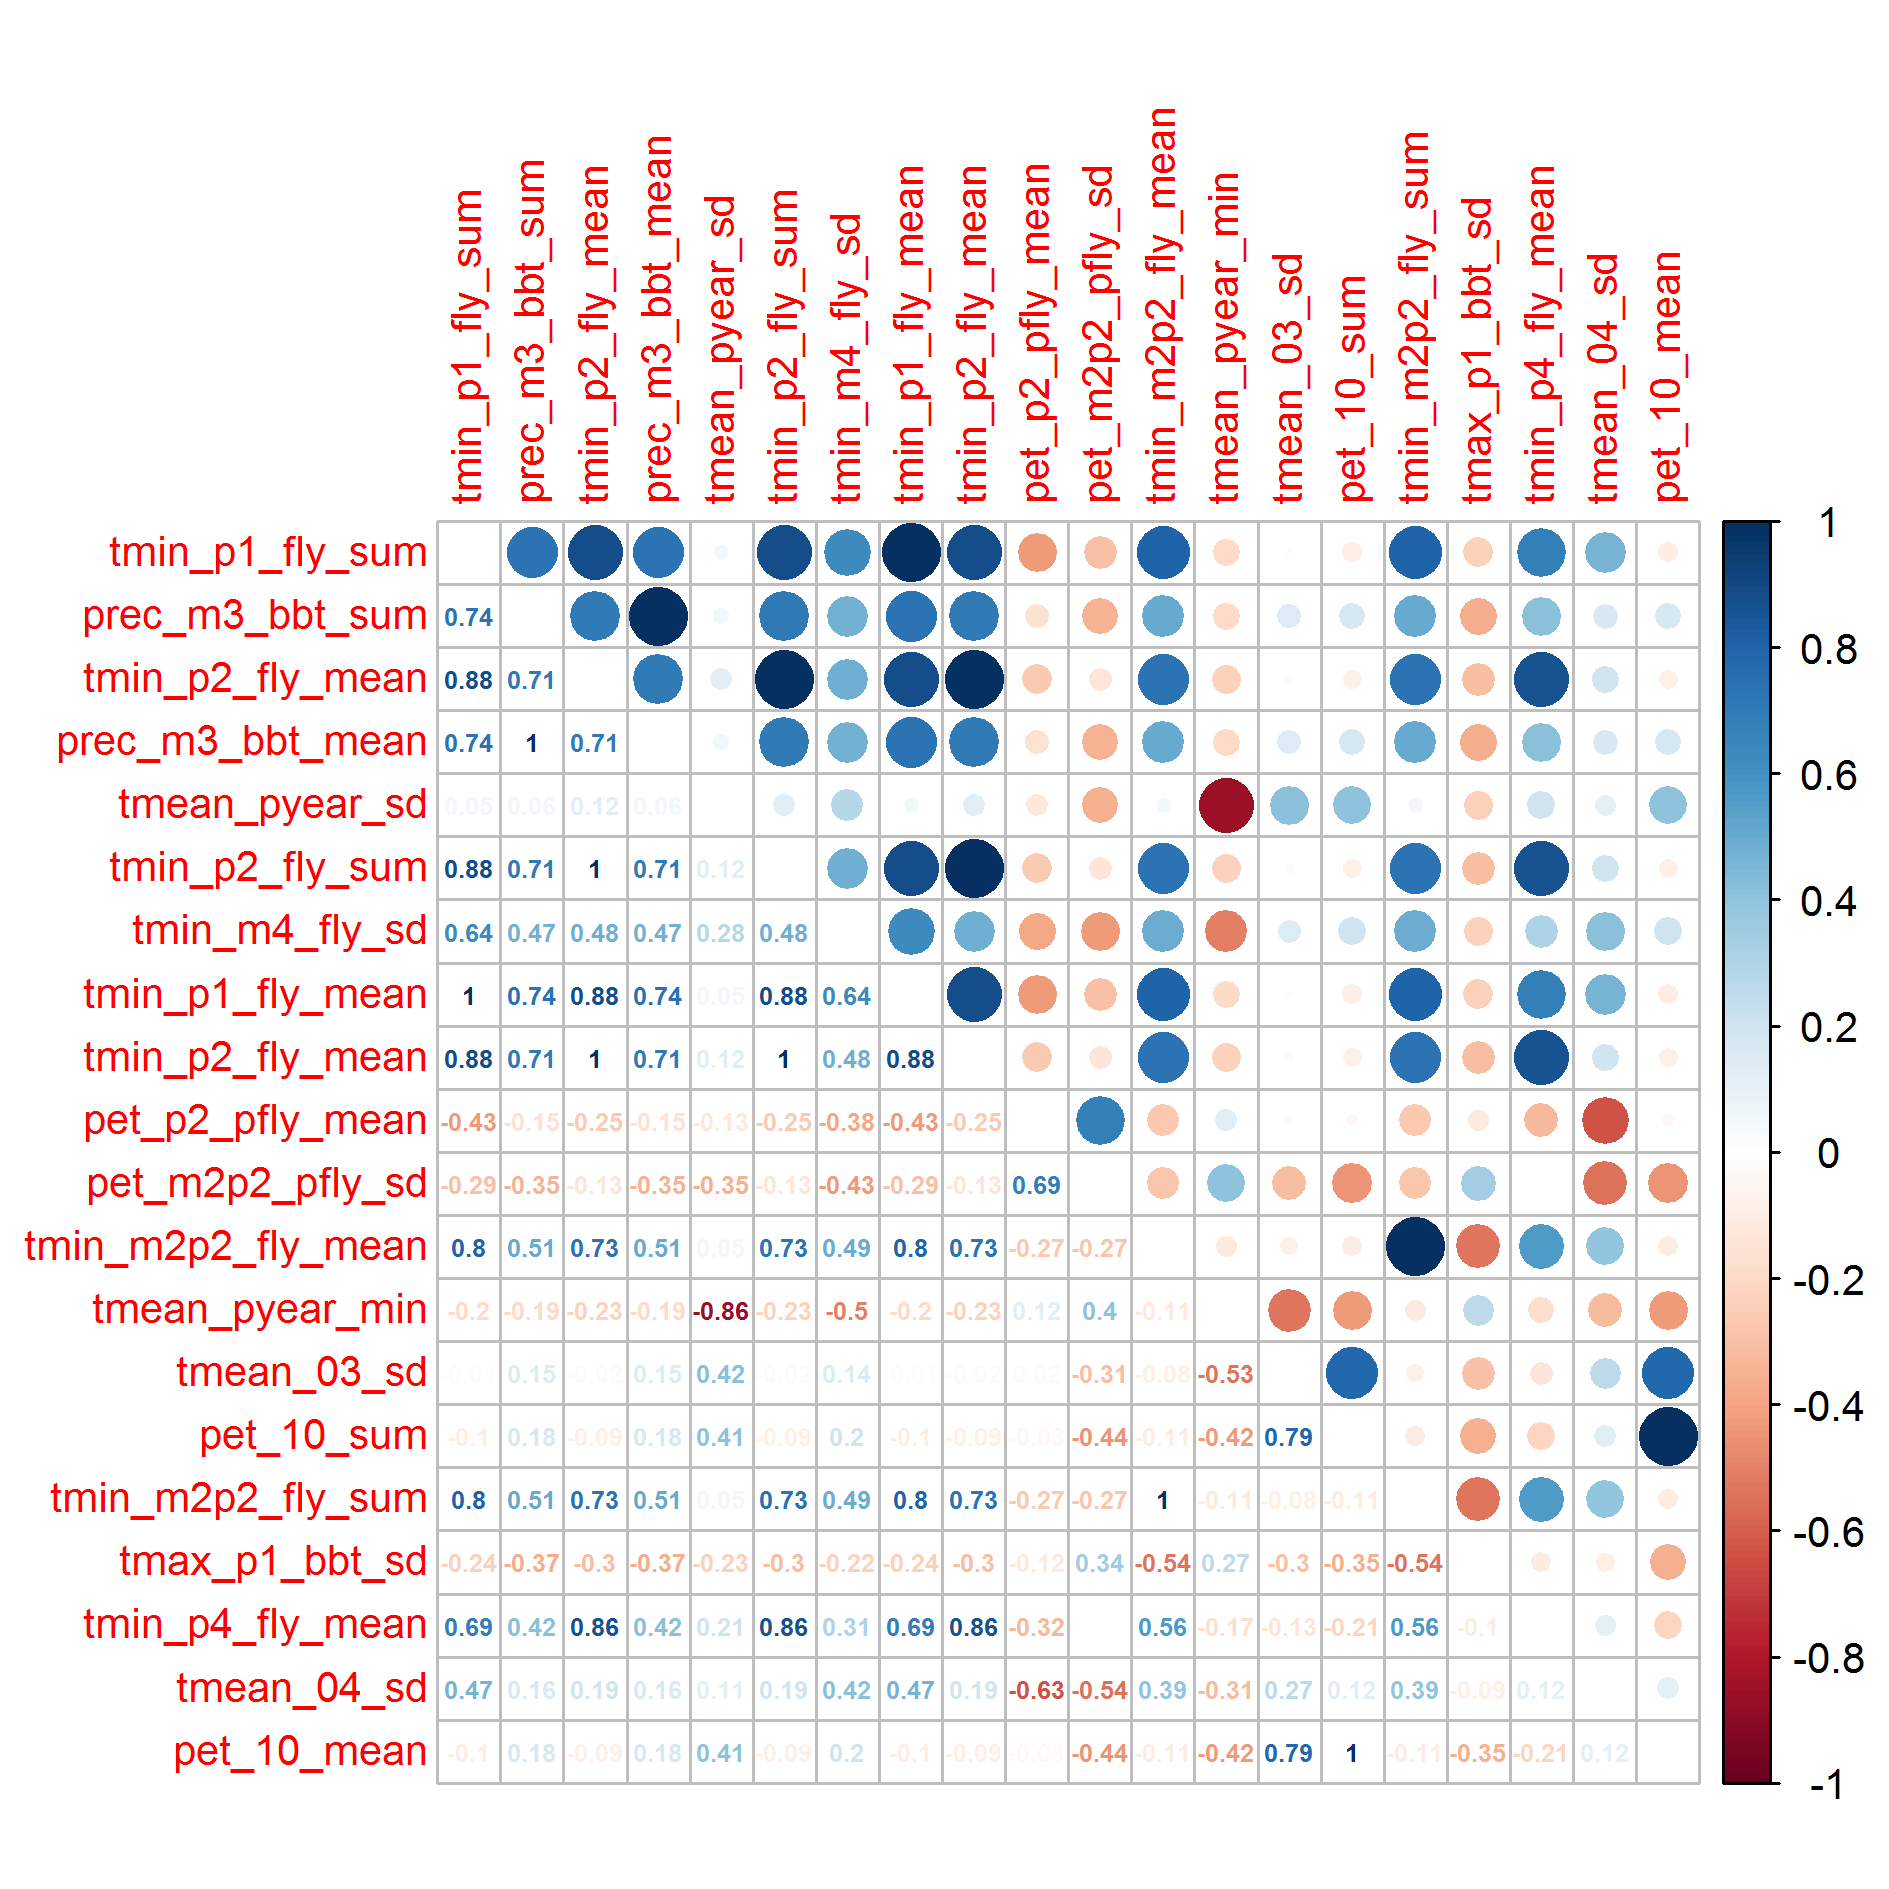


**Figure S1.** Spearman’s rank correlation of the top 20 explanatory variables according to Figure 8. The Spearman’s rank correlation coefficient is listed below the diagonal while a visual representation is given above the diagonal. The strength of the correlation between two variables is indicated by the size of circles. Positive correlations are displayed in blue and negative correlations in red colors.
